# Supplementary material for: Oncogenes and Cancer
Source: Atypon-hosted journal article supplement (doi:10.1056/nejmra072367), 2008-01-30
Supplement: nejm_croce_502sa1.pdf [file nejm_croce_502sa1.pdf]

## Supplementary Appendix

This appendix has been provided by the author to give readers additional information about his work.

Supplement to: Croce CM. Oncogenes and cancer. N Engl J Med 2008;358:502-11.

Supplementary **FIGURE 1.**

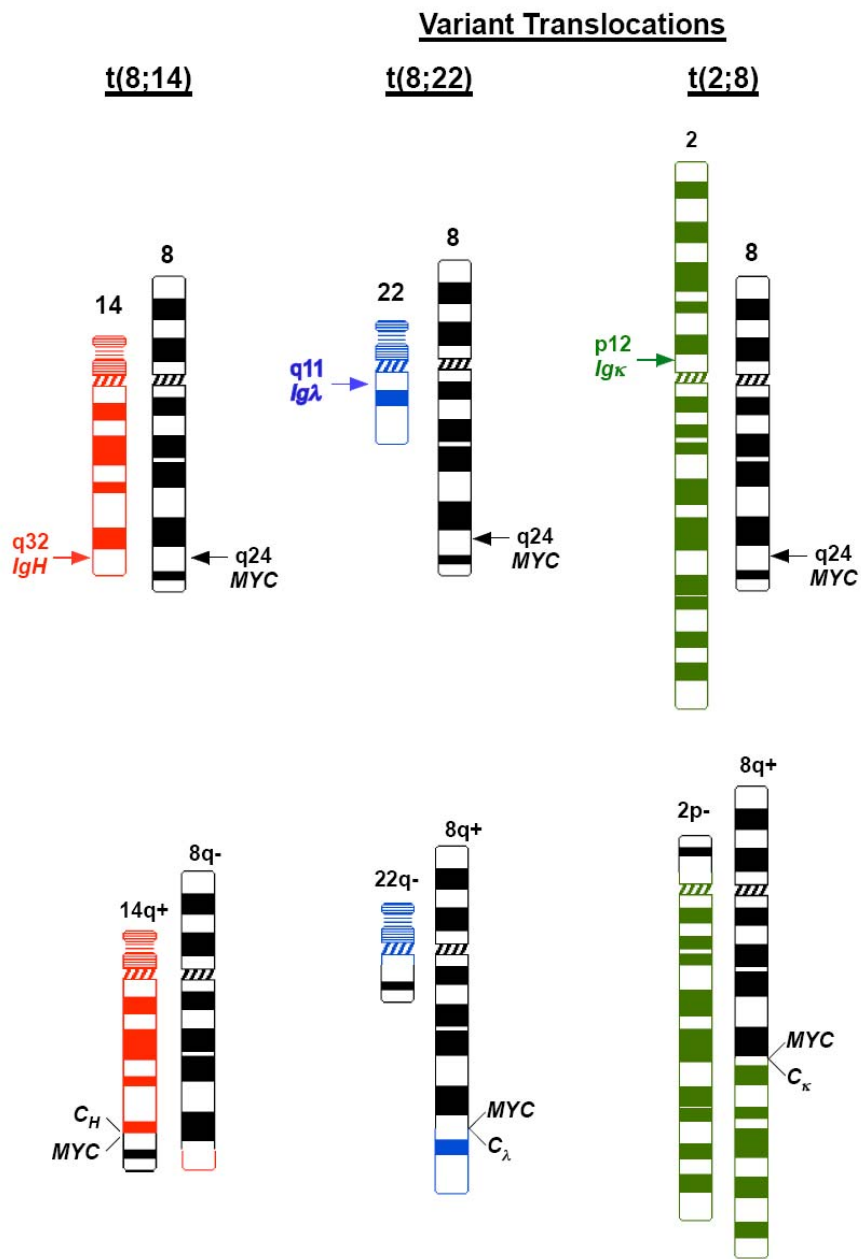

Supplementary **FIGURE 2.**

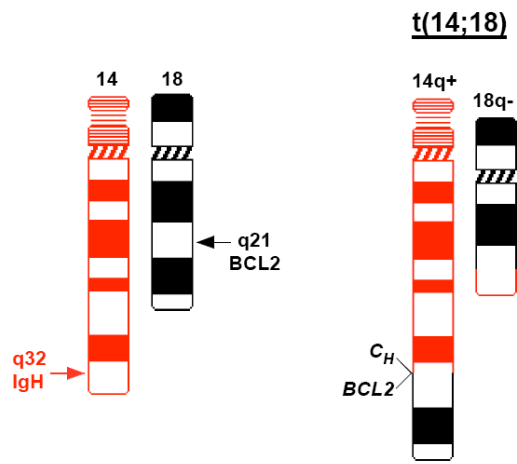

## Legends to Figures

**Supplementary Fig.1** Chromosome translocations observed in Burkitt lymphomas (BL). Upper: chromosomes included in the translocations. Lower: translocated chromosomes. Similar translocations have been observed in a fraction of human B-ALLs. In every case of BL the MYC oncogene is juxtaposed to enhancers present in the human immunoglobulin loci.

**Supplementary Fig. 2** The t(14;18) reciprocal chromosome translocation characteristic of human follicular lymphoma, one of the most common human lymphomas. The translocation juxtaposes the BCL2 gene to enhancer element of the immunoglobulin heavy chain locus causing deregulation of expression of oncogene BCL2.

**Supplementary Table 1. Oncogenes**

| Oncogene                                      | Chromosome   | Method of Identification  | Neoplasm                     | Mechanism of Activation       | Protein Function      |
|-----------------------------------------------|--------------|---------------------------|------------------------------|-------------------------------|-----------------------|
| <b>Transcription factors</b>                  |              |                           |                              |                               |                       |
| <i>v-myc</i>                                  | 8q24.1 (MYC) | Viral homologue           | Carcinoma myelocytomatosis   | Deregulated activity          | Transcription factor  |
| <i>N-MYC</i>                                  | 2p24         | DNA amplification         | Neuroblastoma:lung carcinoma | Deregulated activity          | Transcription factor  |
| <i>L-MYC</i>                                  | 1p32         | DNA amplification         | Carcinoma of lung            | Deregulated activity          | Transcription factor  |
| <i>v-myb</i>                                  | 6q22-24      | Viral homologue           | Myeloblastosis               | Deregulated activity          | Transcription factor  |
| <i>v-fos</i>                                  |              |                           |                              |                               | Transcription factor  |
|                                               | 14q21-22     | Viral homologue           | Osteosarcoma                 | Deregulated activity          | API                   |
| <i>v-jun</i>                                  |              |                           |                              |                               | Transcription factor  |
|                                               | P31-32       | Viral homologue           | Sarcoma                      | Deregulated activity          | API                   |
| <i>v-ski</i>                                  | 1q22-24      | Viral homologue           | Carcinoma                    | Deregulated activity          | Transcription factor  |
| <i>v-rel</i>                                  | 2p12-14      | Viral homologue           | Lymphatic leukemia           | Deregulated activity          | Mutant NFKappa B      |
| <i>v-ets-1</i>                                | 11p23-24     | Viral homologue           | Erythroblastosis             | Deregulated activity          | Transcription factor  |
| <i>v-ets-2</i>                                | 21q24.3      | Viral homologue           | Erythroblastosis             | Deregulated activity          | Transcription factor  |
| <i>v-erbA1</i>                                |              |                           |                              |                               | T3 Transcription      |
|                                               | 17-p11-21    | Viral homologue           | Erythroblastosis             | Deregulated activity          | factor                |
| <i>v-erbA2</i>                                |              |                           |                              |                               | T3 Transcription      |
|                                               | 3p22-24.1    | Viral homologue           | Erythroblastosis             | Deregulated activity          | factor                |
| <b>Inhibitors of apoptosis and others</b>     |              |                           |                              |                               |                       |
| <i>BCL2</i>                                   | 18q21.3      | Chromosomal translocation | B-cell lymphomas             | Deregulated activity          | Antiapoptotic protein |
|                                               |              |                           |                              | Gene amplification/ increased |                       |
| <i>MDM2</i>                                   | 12q14        | DNA amplification         | Sarcomas                     | protein                       | Complexes with p53    |
| <b>Chromatin modifiers</b>                    |              |                           |                              |                               |                       |
| <i>ALL1(MLL)</i>                              | 11q23        | Chromosome translocation  | ALL or AML                   | Gene fusion                   | Chromatin modifier    |
| <i>(This gene can fuse with &gt;50 genes)</i> |              |                           |                              |                               |                       |

**Growth factors**

|              |              |                    |                     |                         |                      |
|--------------|--------------|--------------------|---------------------|-------------------------|----------------------|
| <i>v-sis</i> | 22q12.3-13.1 | Sequence homology  | Glioma/fibrosarcoma | Constitutive production | B chain PDGF         |
| <i>int2</i>  | 11q13        | Proviral insertion | Mammary carcinoma   | Constitutive production | Member of FGF family |
| <i>KS3</i>   | 11q13.3      | DNA transfection   | Kaposi's sarcoma    | Constitutive production | Member of FGF family |
| <i>HST</i>   | 11q13.3      | DNA transfection   | Stomach carcinoma   | Constitutive production | Member of FGF family |

**Growth factor receptors**

Tyrosine kinases:integral membrane proteins

|              |               |                                  |                                                       |                                                                                 |                           |
|--------------|---------------|----------------------------------|-------------------------------------------------------|---------------------------------------------------------------------------------|---------------------------|
| <i>EGFR</i>  | 7P1.1-1.3     | DNA amplification/DNA sequencing | Squamous cell carcinoma<br>Non-small cell lung cancer | Gene amplification/protein/point mutation                                       | EFG receptor              |
| <i>v-fms</i> | 5q33-34 (FMS) | Viral homologue                  | Sarcoma                                               | Constitutive activation                                                         | CSF1 receptor             |
| <i>v-KIT</i> | 4q11-21 (KIT) | Viral homologue/DNA sequencing   | Sarcoma/GIST                                          | Constitutive activation/ point mutation                                         | Stem cell factor receptor |
| <i>v-ros</i> | 6q22 (ROS)    | Viral homologue                  | Sarcoma                                               | Constitutive activation                                                         | ?                         |
| <i>MET</i>   | 7p31          | DNA transfection                 | MNNG-treated human osteocarcinoma cell line           | DNA rearrangement/ ligand-independent constitutive activation (fusion proteins) | HGF/SF receptor           |
| <i>TRK</i>   | 1a32-41       | DNA transfection                 | Colon/thyroid carcinomas                              | DNA rearrangement/ligand-independent constitutive activation (fusion proteins)  | NGF receptor              |
| <i>NEU</i>   | 17q11.2-12    | Point mutation/DNA amplification | Neuroblastoma/breast carcinoma/NSCLC                  | Gene amplification/point mutation                                               | ?                         |
| <i>RET</i>   | 10q11.2       | DNA transfection                 | Carcinomas of thyroid Men 2A.<br>Men 2B               | DNA rearrangement/point mutation (ligand-indepen- dent constitutive             | GFNG/NTT/ART/PSF receptor |

activation/ fusion proteins)

Receptors lacking protein kinase activity

|            |         |                  |                      |                                       |                      |
|------------|---------|------------------|----------------------|---------------------------------------|----------------------|
| <i>mas</i> | 6q24-27 | DNA transfection | Epidermoid carcinoma | Rearrangement of 5' non-coding region | Angiotensin receptor |
|------------|---------|------------------|----------------------|---------------------------------------|----------------------|

**Signal transducers**

Cytoplasmic tyrosine kinases

|              |                   |                          |                 |                                                             |                         |
|--------------|-------------------|--------------------------|-----------------|-------------------------------------------------------------|-------------------------|
| <i>SRC</i>   | 20-12-13          | Viral homologue          | Colon carcinoma | Constitutive activation                                     | Protein tyrosine kinase |
| <i>v-yes</i> | 18q21-3 (YES)     | Viral homologue          | Sarcoma         | Constitutive activation                                     | Protein tyrosine kinase |
| <i>v-fgr</i> | 1p36.1-36.2 (FES) | Viral homologue          | Sarcoma         | Constitutive activation                                     | Protein tyrosine kinase |
| <i>v-fes</i> | 15q25-26 (FES)    | Viral homologue          | Sarcoma         | Constitutive activation                                     | Protein tyrosine kinase |
| <i>ABL</i>   | 9q34.1            | Chromosome translocation | CML             | DNA rearrangement (constitutive activation/fusion proteins) | Protein tyrosine kinase |

Membrane-associated G proteins

|              |              |                                  |                                             |                |                |
|--------------|--------------|----------------------------------|---------------------------------------------|----------------|----------------|
| <i>H-RAS</i> | 11p15.5      | Viral homologue/DNA transfection | Colon, lung, pancreas carcinomas            | Point mutation | GTPase         |
| <i>K-RAS</i> | 12p11.1-12.1 | Viral homologue/DNA transfection | AML, thyroid carcinoma, melanoma/colon/lung | Point mutation | GTPase         |
| <i>N-RAS</i> | 1p11-13      | DNA transfection                 | Carcinoma, melanoma                         | Point mutation | GTPase         |
| <i>BRAF</i>  | 6            | DNA sequencing                   | Melanoma, thyroid, colon, ovary             | Point mutation | Ser/Thr kinase |
| <i>gsp</i>   | 20           | DNA sequencing                   | Adenomas of thyroid                         | Point mutation | Gs alpha       |
| <i>gip</i>   | 3            | DNA sequencing                   | Ovary, adrenal carcinoma                    | Point mutation | Gi alpha       |

| GTPase exchange factor (GEF)                                                                                                                                                  |              |                         |  |                         |                                                                             |                          |
|-------------------------------------------------------------------------------------------------------------------------------------------------------------------------------|--------------|-------------------------|--|-------------------------|-----------------------------------------------------------------------------|--------------------------|
| <i>Dbl</i>                                                                                                                                                                    | Xq27         | DNA transfection        |  | Diffuse B-cell lymphoma | DNA rearrangement                                                           | GEF for Rho and Cdc42Hs  |
| <i>Vav</i>                                                                                                                                                                    | 19p13.2      | DNA transfection        |  | Hematopoietic cells     | DNA rearrangement                                                           | GEF for Ras ?            |
| Serine/threonine kinases : cytoplasmic                                                                                                                                        |              |                         |  |                         |                                                                             |                          |
| <i>v-mos</i>                                                                                                                                                                  | 8q11 (MOS)   | Viral homologue         |  | Sarcoma                 | Constitutive activation                                                     | Protein kinase (ser/thr) |
| <i>v-raf</i>                                                                                                                                                                  | 3p25 (Raf-1) | Viral homologue         |  | Sarcoma                 | Constitutive activation                                                     | Protein kinase (ser/thr) |
| <i>pim-1</i>                                                                                                                                                                  | 6p21 (PIM-)  | Insertional mutagenesis |  | T-cell lymphoma         | Constitutive activation                                                     | Protein kinase (ser/thr) |
| Cytoplasmic regulators                                                                                                                                                        |              |                         |  |                         |                                                                             |                          |
| <i>v-crk</i>                                                                                                                                                                  | 17q13 (CRK)  | Viral homologue         |  |                         | Constitutive tyrosine phosphorylation of cellular substrates (eg, paxillin) | SH-2/SH-3 adaptor        |
| ALL – acute lymphoblastic leukemia ; AML= acute myeloid leukemia ; CML=chronic myelogenous leukemia ; GTPase- guanosine triphosphatase ; PDGF=platelet-derived growth factor. |              |                         |  |                         |                                                                             |                          |

**Supplementary Table 2. Consistent Chromosome Translocations in Human Cancers**

| Affected Gene                            | Rearrangements    | Disease                   | Protein Type |
|------------------------------------------|-------------------|---------------------------|--------------|
| <i>Oncogenes juxtaposed with IG loci</i> |                   |                           |              |
| c-MYC                                    | t(8:14) (q24:q32) | BurKITt's lymphoma;BL-ALL | HLH domain   |
|                                          | t(2:8) (p12:q24)  |                           |              |

|                                           |                                          |                                    |                              |
|-------------------------------------------|------------------------------------------|------------------------------------|------------------------------|
|                                           | t(8:22) (q24;q11)                        |                                    |                              |
| BCL1 (Cyclin D1)                          | t(11:14) (q13;q32)                       | B-cell chronic lymphocyte leukemia | PRADI-GI Cyclin D1           |
| BCL-2                                     | t(14:18) (q32;q21)                       | Follicular lymphoma                | Inner mitochondrial membrane |
| BCL-3                                     | t(14:19) (q32;q13.1)                     | Chronic B-cell leukemia            | CDC10 motif                  |
| IL-3                                      | t(5:14) (q31;q32)                        | Acute pre-B-cell leukemia          | Growth factor                |
| <i>Oncogenes juxtaposed with TRC loci</i> |                                          |                                    |                              |
| c-MYC                                     | t(8:14) (q24;q11)                        | Acute T-cell leukemia              | HLH domain                   |
| LYLA                                      | t(7:19) (q35;p13)                        | Acute T-cell leukemia              | HLH domain                   |
| TAL1/SCL/TCL-5                            | t(1:14) (q32;q11)                        | Acute T-cell leukemia              | HLH domain                   |
| TAL-2                                     | t(7:9) (q35;q34)                         | Acute T-cell leukemia              | HLH domain                   |
| Rhombotin 1/Ttg-1                         | t(11:14) (p15;q11)                       | Acute T-cell leukemia              | LIM domain                   |
| Rhombotin 2/Ttg-2                         | t(11:14) (p13;q11)                       | Acute T-cell leukemia              | LIM domain                   |
|                                           | t(7:11) (q35;p13)                        |                                    |                              |
| HOX 11                                    | t(10:14) (q24;q11)                       | Acute T-cell leukemia              | Homeodomain                  |
|                                           | t(7:10) (q35;q24)                        |                                    |                              |
| TAN-1                                     | t(7:9) (q34;q34.3)                       | Acute T-cell leukemia              | Notch homologue              |
| TCL-1                                     | T(14;14) q11;q32.1<br>or t(7q35-14q32.1) | T-cell prolymphocytic leukemia     |                              |

or inv14(q11;q32.1)

*Hematopotetic tumor*

Gene fusion

|              |                       |                                                 |                                  |
|--------------|-----------------------|-------------------------------------------------|----------------------------------|
| c-ABL (9q34) | t(9:22) (q34;q11)     | Chronic myelogenous leukemia and acute leukemia | Tyrosine kinase activated by BCR |
| BCR (22q11)  |                       |                                                 |                                  |
| PBX-1 (1q23) | t(1:19) (q23;p13.3)   | Acute pre-B-cell leukemia                       | Homeodomain                      |
| E2A(19p13.3) |                       |                                                 | HLH                              |
| PML(15q21)   | t(15:27) (q21;q11-22) | Acute promyelocytic leukemia                    | Zn finger                        |
| RAR(17q21)   |                       |                                                 |                                  |
| CAN(6-23)    | t(6:9) (P23;q34)      | Acute myeloid leukemia                          | No homology                      |
| DEK(9q34)    |                       |                                                 |                                  |
| REL          | ins(2:12) (p11.2-14)  | Non-Hodgkin's lymphoma                          | NF-κB family                     |
| ALL1(MLL)*   | 11q23                 | ALL and AML                                     | Chromatin modifier               |

*Solid tumors*

Gene Fusions in sarcomas

|          |                    |                 |                                 |
|----------|--------------------|-----------------|---------------------------------|
| FLI1,EWS | t(11:22) (q24;q12) | Ewing's sarcoma | Ets transcription factor family |
| ERG,EWS  | t(21:22) (q22;q12) | Ewing's sarcoma | Ets transcription factor        |

|                                       |                            |                                        |                                          |
|---------------------------------------|----------------------------|----------------------------------------|------------------------------------------|
|                                       |                            |                                        | family                                   |
| ATV1,EWS                              | t(7:21) (q22;q12)          | Ewing's sarcoma                        | Ets transcription factor                 |
|                                       |                            |                                        | family                                   |
| ATF1,EWS                              | t(12:22) (q13;q12)         | Soft-tissue clear cell sarcoma         | Transcription factor                     |
| CHN,EWS                               | t(9:22) (q22 31;q12)       | Myxoid chondrosarcoma                  | Steroid receptor family                  |
| WT1,EWS                               | t(11:22) (p13;q12)         | Desmoplastic small round<br>cell tumor | Wilms' tumor gene                        |
| SSX1,SSX2,SYT                         | t(X18) (p11.2;q11.2)       | Synovial sarcoma                       | HLH domain                               |
| PAX3,FKHR                             | t(2:13) (q37;q14)          | Alveolar                               | Homeobox homologue                       |
| PAX7,FKHR                             | t(1:13) (q36;q14)          | Rhabdomyosarcoma                       | Homeobox homologue                       |
| CHOP,TLS                              | t(12:16) (q13;p11)         | Myxoid liposarcoma                     | Transcription factor                     |
| var,HMG1-C                            | t(var:12) (var:q13-<br>15) | Lipomas                                | HMG DNA-binding protein                  |
| HMG2-C?                               | t(12:14) (q13;q15)         | Leiomyomas                             | HMG DNA-binding protein                  |
| Gene fusions in thyroid<br>carcinomas |                            |                                        |                                          |
| RET/ptc1                              | inv(10) (q11.2;q2.1)       | Papillary thyroid carcinomas           | Tyrosine kinase activated by<br>H4       |
| RET/ptc2                              | t(1:17) (q11.2;q23)        | Papillary thyroid carcinomas           | Tyrosine kinase activated by<br>RIa(PKA) |

|                                        |                |                               |                              |                                                            |
|----------------------------------------|----------------|-------------------------------|------------------------------|------------------------------------------------------------|
| RET/ptc3                               |                | inv(10) (q11.2)               | Papillary thyroid carcinomas | Tyrosine kinase activated by<br>ELE1                       |
| TRK                                    |                | inv(1) (q31;q22-23)           | Papillary thyroid carcinomas | Tyrosine kinase activated by<br>TPM3                       |
| TRK-T1(T2)                             |                | inv(1) (q31;q25)              | Papillary thyroid carcinomas | Tyrosine kinase activated by<br>TPR                        |
| TRK-T3                                 |                | t(1q31:3)                     | Papillary thyroid carcinomas | Tyrosine kinase activated by<br>TFG                        |
| <i>Gene fusions in prostate cancer</i> |                |                               |                              |                                                            |
| TMPR552                                | ERG or<br>ETV1 | t(21q22;21q22.3 or<br>7p21.2) | Prostate carcinoma           | Ets transcription factor<br>family activated by<br>TMPR552 |
| <i>Deregulation of oncogenes</i>       |                |                               |                              |                                                            |
| Parathyroid tumors                     |                |                               |                              |                                                            |
| PTH deregulates PRAD1<br>(Cyclin D1)   |                | inv(11)(P15q;q13)             | Parathyroid adenoma          | PRADI/Cyclin D1                                            |

\*ALL1 can fuse with more than 50 different genes. More frequently it fuses with AF4 in ALL and AF9 in AML

**Supplementary Table 3. Oncogene Amplification in Human Cancers**

| <b>Tumor Type</b>             | <b>Gene Amplified</b>    | <b>Percent of Tumors</b> |
|-------------------------------|--------------------------|--------------------------|
| <b>Neuroblastoma</b>          | <b>MYCN</b>              | <b>~20</b>               |
| <b>Small cell lung cancer</b> | <b>MYC</b>               | <b>~15</b>               |
| <b>Glioblastoma</b>           | <b>ERBB1 (EGFR)</b>      | <b>~30</b>               |
| <b>Breast cancer</b>          | <b>MYC</b>               | <b>~20</b>               |
|                               | <b>EGFR2</b>             | <b>~20</b>               |
|                               | <b>FGFR1</b>             | <b>~10</b>               |
|                               | <b>FGFR2</b>             | <b>~10</b>               |
|                               | <b>CCND1 (Cyclin D1)</b> | <b>15-20</b>             |
| <b>Esophageal cancer</b>      | <b>MYC</b>               | <b>~35</b>               |
|                               | <b>CCND1 (Cyclin D1)</b> | <b>25</b>                |
| <b>Gastric cancer</b>         | <b>KRAS</b>              | <b>10</b>                |
|                               | <b>CCNE (Cyclin E)</b>   | <b>15</b>                |
| <b>Hepatocellular cancer</b>  | <b>CCND1 (Cyclin D1)</b> | <b>~15</b>               |

|                             |                         |              |
|-----------------------------|-------------------------|--------------|
| <b>Sarcoma</b>              | <b>MDM2</b>             | <b>10-30</b> |
|                             | <b>CDK4</b>             | <b>~10</b>   |
| <b>Cervical cancer</b>      | <b>MYC</b>              | <b>25-50</b> |
| <b>Ovarian cancer</b>       | <b>MYC</b>              | <b>20-30</b> |
|                             | <b>ERBB2 (EGFR2)</b>    | <b>15-30</b> |
|                             | <b>AKT2</b>             | <b>~10</b>   |
| <b>Head and neck cancer</b> | <b>MYC</b>              | <b>~10</b>   |
|                             | <b>ERB B2 (EGFR2)</b>   | <b>10</b>    |
|                             | <b>CCND (Cyclin D1)</b> | <b>~50</b>   |
| <b>Colorectal cancer</b>    | <b>MYB</b>              | <b>15-20</b> |
|                             | <b>HRAS</b>             | <b>29</b>    |
|                             | <b>KRAS</b>             | <b>22</b>    |
